# Supplementary figures and images for: Cideb controls sterol‐regulated ER export of SREBP/SCAP by promoting cargo loading at ER exit sites
Source: PubMed Central journal article supplement — EMBO J. 2019 Mar 12;38(8):e100156. doi: 10.15252/embj.2018100156 (PMC6463267; doi:10.15252/embj.2018100156), 2019-03-12

Figure 2D

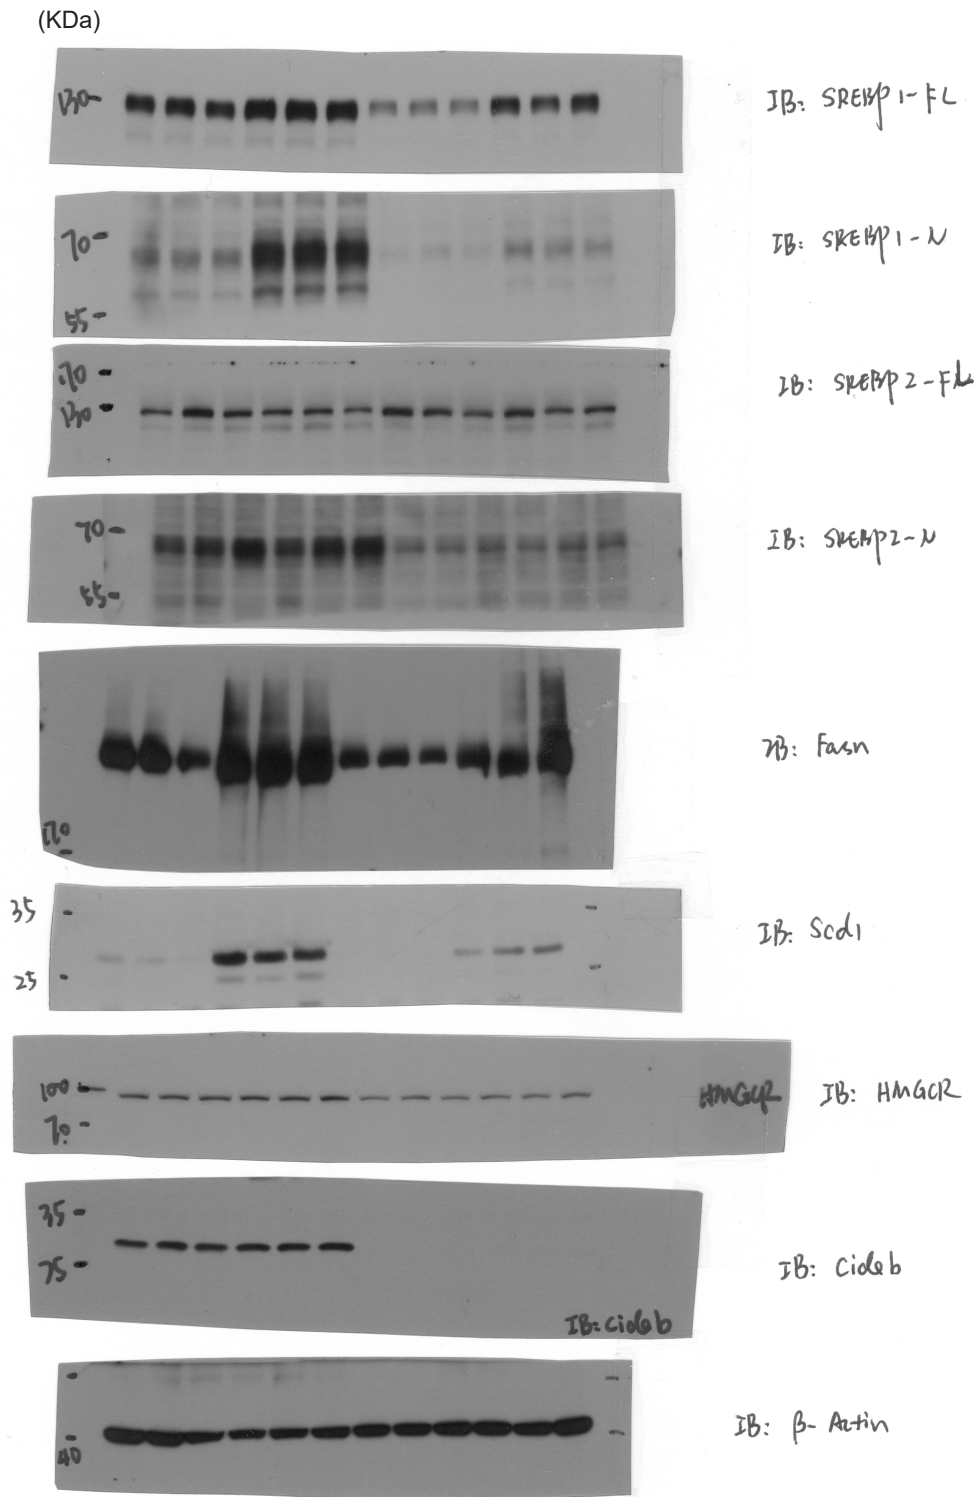

Supplement: EMBJ-38-e100156-s004.pdf [file EMBJ-38-e100156-s004.pdf]

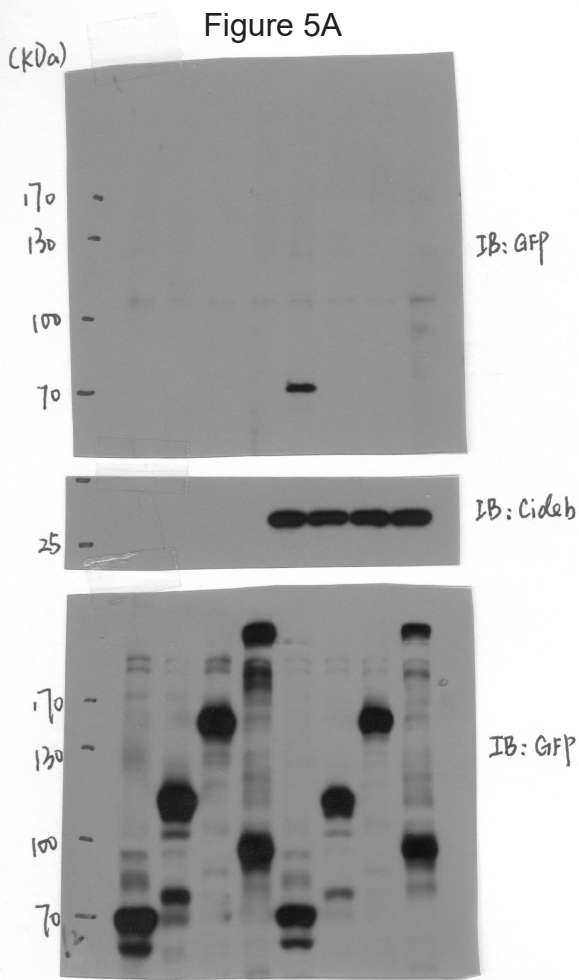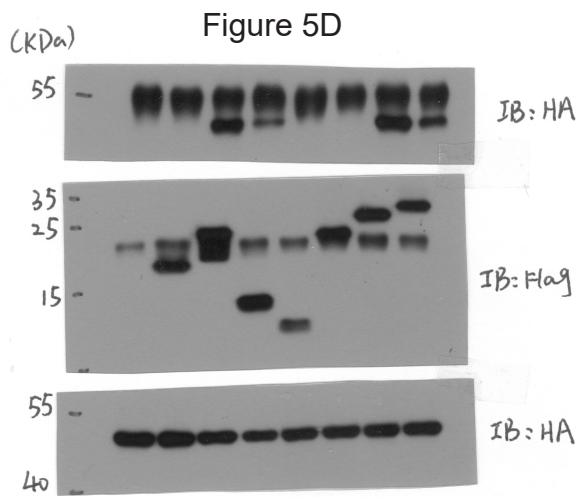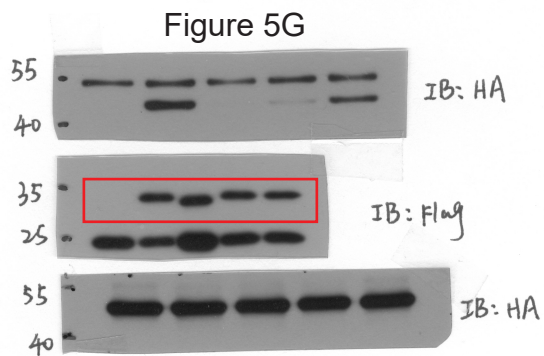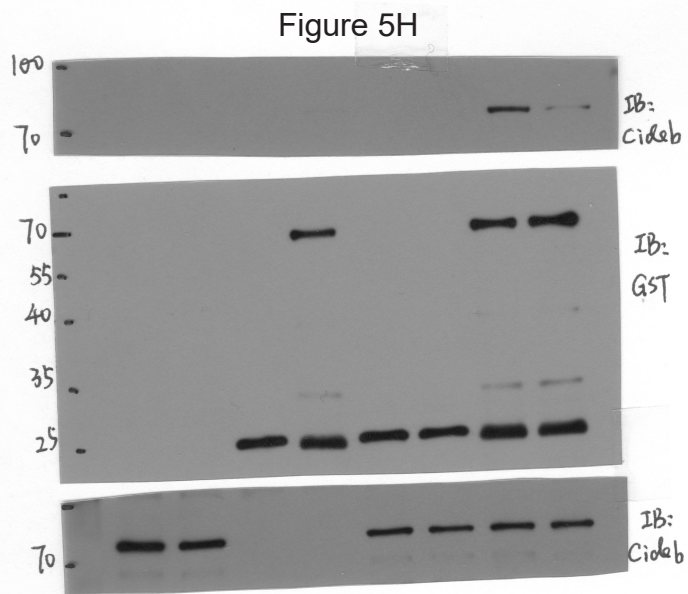

**Figure 5J**

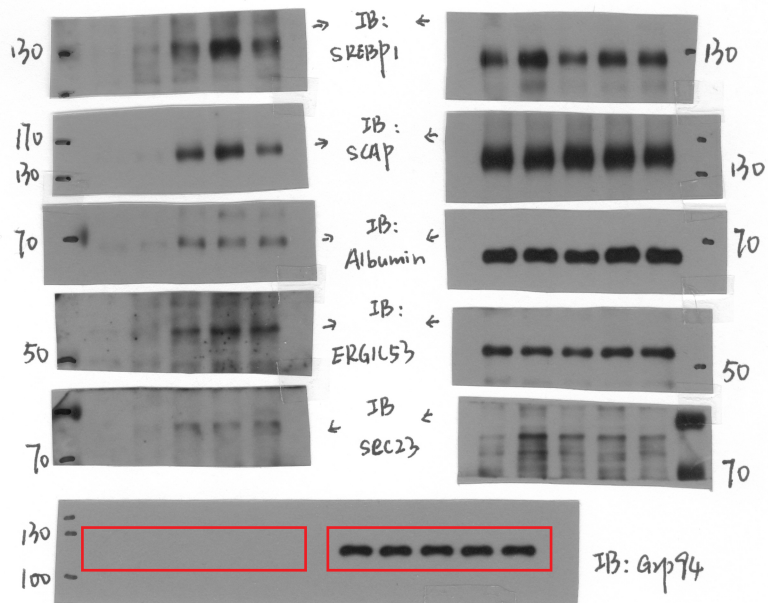

**Figure 5I**

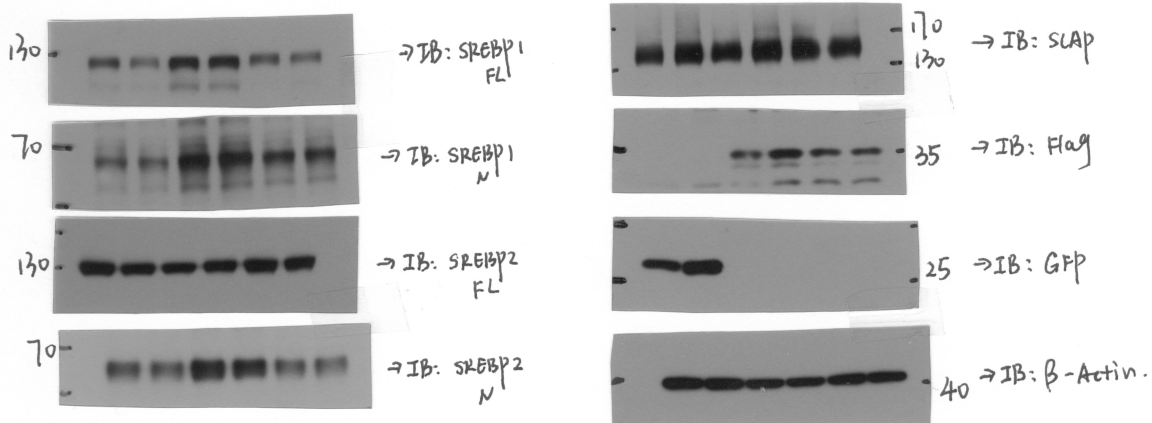

Supplement: EMBJ-38-e100156-s007.pdf [file EMBJ-38-e100156-s007.pdf]
